# Supplementary material
Source: MDPI journal article supplement (https://www.mdpi.com/1424-2818/13/5/199)
Supplement: s1 [file s1]

**Table S1.** Georeferenced list of sampled sites on the Ojo Guareña Natural Monument.

| Site                 | Locality                   | UTM<br>Coordinates<br>(30T) |         |     |
|----------------------|----------------------------|-----------------------------|---------|-----|
|                      |                            | X                           | Y       | Z   |
| CAVES                |                            |                             |         |     |
| OG. Palomera         | Cueva                      | 446595                      | 4764790 | 714 |
| 1. Sima Rizuelos     | Villamartín de Sotoscueva  | 445178                      | 4764268 | 763 |
| 2. Kaite 2           | Cueva                      | 446349                      | 4765570 | 862 |
| 3. Sima Jaime        | Cornejo                    | 449708                      | 4764276 | 636 |
| 4. La Mina           | Cornejo                    | 448875                      | 4764802 | 673 |
| 5. Prado Vargas      | Cornejo                    | 448748                      | 4764761 | 662 |
| 6. Garcia            | Villamartín de Sotoscueva  | 442630                      | 4763545 | 934 |
| 7. San Bernabé       | Cueva                      | 446140                      | 4765563 | 757 |
| 8. San Miguel        | Quisicedo                  | 447217                      | 4766549 | 679 |
| 9. Llanas            | Villamartín de Sotoscueva  | 444260                      | 4764854 | 866 |
| 10. Cornejo          | Cornejo                    | 448840                      | 4764830 | 650 |
| 11. Racino           | Villamartín de Sotoscueva  | 444103                      | 4763559 | 832 |
| 12. Redonda          | Cornejo                    | 444103                      | 4764811 | 668 |
| SPRINGS              |                            |                             |         |     |
| 1. Torcona           | Hornillayuso               | 450661                      | 4762560 | 633 |
| 2. Pozo del Infierno | Quintanilla de Valdebodres | 445348                      | 4759578 | 661 |
| 3. Cornejo           | Cornejo                    | 448992                      | 4764304 | 643 |
| 4. La Mea            | Quintanilla de Valdebodres | 444746                      | 4759464 | 735 |
| 5. Villa             | Villamartín de Sotoscueva  | 445145                      | 4763215 | 811 |
| 6. Salce             | Villamartín de Sotoscueva  | 446329                      | 4762894 | 785 |
| 7. Cubio             | Villamartín de Sotoscueva  | 446427                      | 4763821 | 755 |
| 8. Calzada           | Hornillayuso               | 450900                      | 4762300 | 618 |
| 9. Jordana           | Villamartín de Sotoscueva  | 444273                      | 4763872 | 805 |
| 10. Mazo             | Cornejo                    | 449120                      | 4763430 | 700 |
| 11. Avellanos        | Quintanilla del Rebollar   | 449198                      | 4766878 | 673 |
| 12. Mazo 2           | Cornejo                    | 449110                      | 4763428 | 683 |
| RIVERS/STREAMS       |                            |                             |         |     |
| 1. Guareña           | Cueva                      | 445841                      | 4765533 | 563 |
| 2. Ulemas            | Quintanilla del Rebollar   | 449031                      | 4766449 | 666 |
| 3.1. Trema-1         | Cornejo                    | 448681                      | 4764430 | 638 |
| 3.2. Trema-2         | Hornillayuso               | 451301                      | 4762450 | 605 |
| 3.3. Trema-3         | Torme                      | 454396                      | 4760064 | 617 |
| 4.1. Trueba-1        | Machorras                  | 452449                      | 4774304 | 812 |
| 4.2. Trueba-2        | Bárcenas                   | 453762                      | 4772171 | 772 |
| 4.3. Trueba-3        | Espinosa de los Monteros   | 456750                      | 4768183 | 723 |
| 5. Engaña            | S. Matín de Porrés         | 440481                      | 4763534 | 703 |
| 6. Nela-1            | Santelices                 | 439661                      | 4759979 | 645 |
| 6.1.Nela-2           | Puente de y                | 445454                      | 4758908 | 609 |
| 7. Arroyo de la Hoz  | Hornillatorre              | 446820                      | 4767100 | 700 |
| WELLS                |                            |                             |         |     |
| 1. Torcon            | Hornillayuso               | 451082                      | 4762781 | 633 |
| 2. Chalet            | Villabascos                | 445509                      | 4766403 | 727 |

**Table S2.** List of stygophiles and troglaphiles species and sites where the stygophiles have been found in Ojo Guareña Natural Monument. OG = main cave; C = Cave; R = hyporheic of river; S = Spring and W = Well. Sites: reference number from the Table S1.

|                      | <b>Stygophiles</b>                                              | <b>Sites</b>                                                                        |
|----------------------|-----------------------------------------------------------------|-------------------------------------------------------------------------------------|
| <b>Rotifera</b>      | 1 <i>Keratella</i> sp.                                          | OG12                                                                                |
| <b>Oligochaeta</b>   | 2 <i>Aelosoma</i> sp.                                           | OG10                                                                                |
|                      | 3 <i>Cernosvitoviella palustris</i> Healy, 1979                 | 11S; 3R, 6R                                                                         |
|                      | 4 <i>Lophochaeta ignota</i> (Stolc, 1886)                       | 6R                                                                                  |
|                      | 5 <i>Marionina</i> cf <i>argentea</i> (Michaelson, 1889)        | OG:02,07,10,14,15,39,40; 8C, 10C, 11C, 12C; 1S, 5S, 6S, 8S, 11S; 3R, 4R, 5R, 6R; 1W |
|                      | 6 <i>Pristina jenkiniae</i> (Stephenson, 1931)                  | OG: 02, 08; 8S; 4R                                                                  |
|                      | 7 <i>Rhyacodrilus falciformis</i> Bretscher, 1901               | OG:02,08,10,14,15; 4S                                                               |
|                      | 8 <i>Rhyacodrilus</i> sp.                                       | OG:07, 08; 1S                                                                       |
|                      | 9 <i>Stylo-drilus heringianus</i> Claparède, 1862               | OG12; 3R                                                                            |
| <b>Mollusca</b>      | 10 <i>Belgrandiella cantabrica</i> Rolán, 1993                  | 5S, 11S, 12S                                                                        |
| <b>Hydracnidia</b>   | 11 <i>Axonopsis guadarramensis</i> Valdecasas, 1981             | 8C                                                                                  |
| <b>Copepoda</b>      |                                                                 |                                                                                     |
| <b>Cyclopida</b>     | 12 <i>Diacyclops bicuspidatus</i> Claus, 1857                   | OG:07, 09, 40-42, 45-47                                                             |
|                      | 13 <i>D. b. odessanus</i> (Schmankevitchlaus, 1875)             | OG10                                                                                |
|                      | 14 <i>D. bisetosus</i> (Rehberg, 1880)                          | OG:01, 02, 07-10, 12, 35, 36, 38; 8C, 10C, 11C; 3R, 4R                              |
|                      | 15 <i>D. crassicaudis</i> Sars, 1863                            | OG12                                                                                |
|                      | 16 <i>Diacyclops</i> sp. SB group <i>languidoides italianus</i> | OG09,14,53; S,                                                                      |
|                      | 17 <i>Diacyclops</i> sp. SC group <i>languidoides</i>           | 6R                                                                                  |
| <b>Harpacticoida</b> | 18 <i>Attheyella crassa</i> (Sars, 1863)                        | 4C, 11C; 1S, 4S, 6S, 7S, 8S, 10S, 11S; 3R, 4R, 5R, 6R                               |
|                      | 19 <i>Bryocamptus echinatus</i> (Mrazek, 1893)                  | 11C; 1S, 4S, 8S, 10S, 11S; 4R, 5R                                                   |
|                      | 20 <i>Canthocamptus staphylinus</i> (Jurine, 1820)              | 6S, 9S                                                                              |
|                      | 21 <i>Epactophanes richardi</i> (Mrazek, 1893)                  | 3R, 4R                                                                              |
|                      | 22 <i>Maraenobiotus vejdoovskyi truncatus</i> Gurney, 1932      | 2C                                                                                  |
|                      | 23 <i>Paracamptus schmeili</i> (Mrazek, 1893)                   | 1S, 6S, 11S; 3R, 4R, 6R                                                             |
| <b>Ostracoda</b>     | 24 <i>Candona candida</i> (Müller, 1776)                        | OG:07-11,12, 17, 31-34, 55; 11S                                                     |
|                      | 25 <i>Candona neglecta</i> Sars, 1887                           | OG:07, 09, 10, 12, 14, 15; 6S, 9S                                                   |
|                      | 26 <i>Cryptocandona "vavrai"</i> Kaufmann, 1900                 | 8C; 7R                                                                              |
|                      | 27 <i>Cyclocypris</i> cf <i>ovum</i> (Jurine, 1820)             | 3R, 4R                                                                              |
|                      | 28 <i>Ilyocypris</i> sp.                                        | 7S                                                                                  |
|                      | 29 <i>Potamocypris</i> n. sp. 1 cf " <i>fulva</i> "             | OG: 02, 07, 08, 12,14, 17, 20; 1C, 2C, 7C; 4R                                       |
|                      | 30 <i>Potamocypris</i> n. sp. 2 cf " <i>zsoskhei</i> "          | 8C; 7S, 10S, 11S; 4R, 6R                                                            |
|                      | 31 <i>Potamocypris</i> n. sp. 3 cf " <i>variegata</i> "         | 6R                                                                                  |
|                      | 32 <i>Pseudocandona albicans</i> (Brady, 1864)                  | OG: 10, 32, 36, 40, 42-45, 47, 52, 53, 8C, 10C, 11C; 10F                            |
| <b>Isopoda</b>       | 33 <i>Proasellus</i> cf <i>ortizi</i> Henry &                   | OG: 02, 12, 36; 2S, 9S, 11S; 4R                                                     |

|                          |                                                  |                    |
|--------------------------|--------------------------------------------------|--------------------|
| Magniez, 1992            |                                                  |                    |
| <b>Hirudinea</b>         | 34 <i>Glossiphonia complanata</i> Linnaeus, 1758 | OG: 32, 36; 3R, 7R |
| <b>Troglophiles</b>      |                                                  |                    |
| <b>Acari</b>             | 1 <i>Achipteria coleoptrata</i> (Linnaeus, 1758) |                    |
|                          | 2 <i>Ceratoppia bipilis</i> (Hermann, 1804)      |                    |
|                          | 3 <i>Ceratozetes simulator</i> Pérez-Iñigo, 1969 |                    |
|                          | 4 <i>Oppia obsoleta</i> (Paoli, 1804)            |                    |
|                          | 5 <i>Oppia ornata</i> (Oudemans, 1900)           |                    |
| <b>Araneae</b>           | 6 Undetermined                                   |                    |
| <b>Opiliones</b>         | 7 <i>Ischryopsalis nodifera</i> Simon, 1879      |                    |
| <b>Pseudoscorpionida</b> | 8 Undetermined                                   |                    |
| <b>Myriapoda</b>         | 9 Undetermined 1                                 |                    |
|                          | 10 Undetermined 2                                |                    |
| <b>Coleoptera</b>        | 11 <i>Deleaster dichrous</i> (Gravenhorst, 1802) |                    |
|                          | 12 <i>Metopsia clypeata</i> (Miller, 1821)       |                    |
|                          | 13 <i>Ptinus clavipes</i> Panzer, 1792           |                    |
| <b>Isopoda</b>           | 14 <i>Oniscus asellus</i> Linnaeus, 1758         |                    |

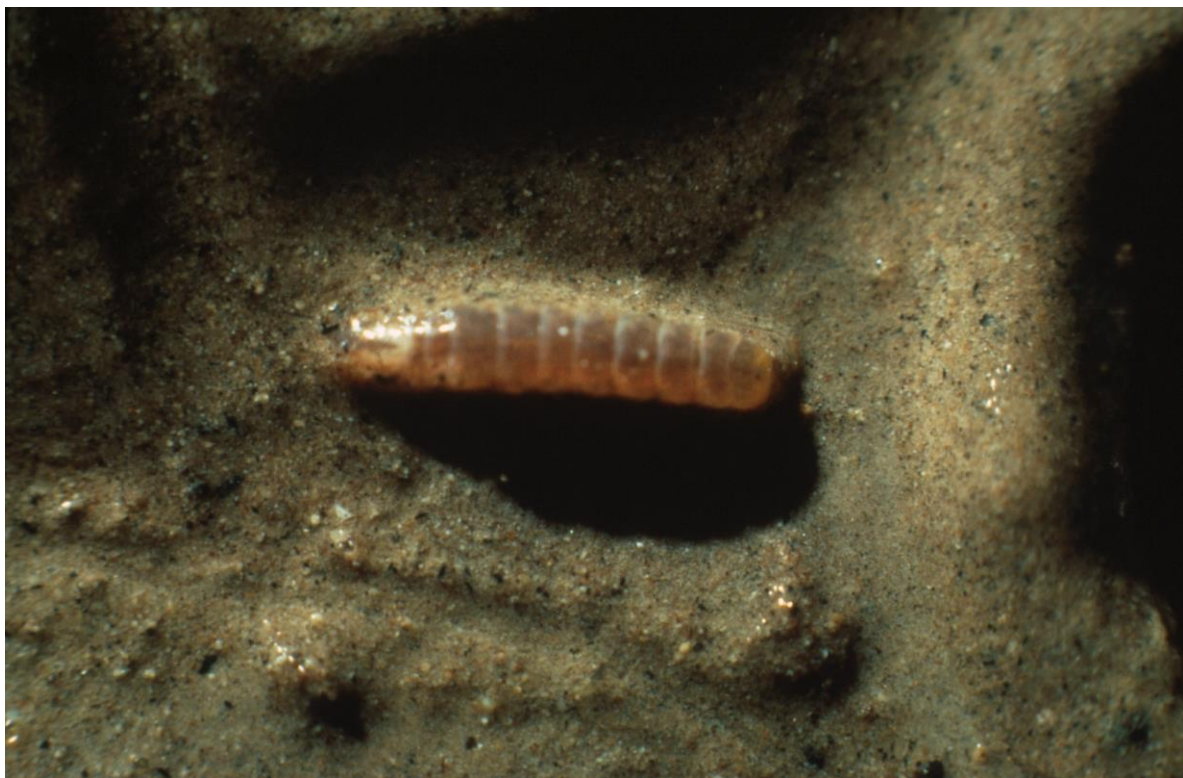

**Figure S1.** *Stenasellus virei buchneri* (Stammer, 1936) in OG14.
